# Supplementary material
Source: PubMed Central journal article supplement (PMC8851371)
Supplement: jamapsychiatry-e214363-s001.pdf [file jamapsychiatry-e214363-s001.pdf]

## Supplemental Online Content

Devanand DP, Lee S, Huey ED, Goldberg TE. Associations between neuropsychiatric symptoms and neuropathological diagnoses of Alzheimer disease and related dementias. *JAMA Psychiatry*. Published online February 16, 2022.  
doi:10.1001/jamapsychiatry.2021.4363

**eTable 1.** Frequencies of NPI-Q domain scores (present at any time-point) and neuropathology subtypes (present/absent)

**eTable 2.** Linear regression analyses of neuropathology subtypes (present/absent) on mean NPI-Q scores during follow-up

**eTable 3.** Prevalence of single vs concurrent apathy and disinhibition in Frontotemporal Lobar Degeneration and Hippocampal Sclerosis

This supplemental material has been provided by the authors to give readers additional information about their work.

**eTable 1. Frequencies of NPI-Q domain scores (present at any time-point) and neuropathology subtypes (present/absent)**

| NPI-Q Domain Ever Present  | AD   |     | LBD |      | CAA  |     | CVD |      | FTLD |      | HS  |      | NP  |      |
|----------------------------|------|-----|-----|------|------|-----|-----|------|------|------|-----|------|-----|------|
|                            | Yes  | No  | Yes | No   | Yes  | No  | Yes | No   | Yes  | No   | Yes | No   | Yes | No   |
| Number                     | 1246 | 518 | 658 | 1137 | 1117 | 681 | 568 | 1237 | 303  | 1474 | 254 | 1497 | 131 | 1677 |
| Delusions %                | 36   | 17  | 36  | 27   | 35   | 24  | 30  | 31   | 21   | 32   | 38  | 29   | 18  | 32   |
| Hallucinations %           | 26   | 10  | 29  | 17   | 24   | 17  | 18  | 23   | 10   | 24   | 22  | 21   | 15  | 22   |
| Agitation/aggression %     | 64   | 52  | 63  | 59   | 65   | 54  | 60  | 61   | 54   | 62   | 68  | 59   | 55  | 61   |
| Dysphoria/depression %     | 62   | 55  | 65  | 57   | 61   | 59  | 62  | 59   | 58   | 60   | 61  | 60   | 53  | 61   |
| Anxiety %                  | 68   | 52  | 69  | 61   | 67   | 58  | 63  | 64   | 58   | 65   | 65  | 64   | 47  | 65   |
| Euphoria/elation %         | 15   | 13  | 15  | 14   | 15   | 14  | 13  | 16   | 16   | 15   | 16  | 14   | 13  | 15   |
| Apathy %                   | 70   | 64  | 72  | 66   | 69   | 66  | 64  | 70   | 77   | 66   | 80  | 66   | 60  | 69   |
| Disinhibition %            | 49   | 44  | 48  | 47   | 48   | 47  | 45  | 48   | 49   | 47   | 61  | 45   | 41  | 48   |
| Irritability/lability %    | 66   | 56  | 64  | 63   | 66   | 58  | 65  | 62   | 58   | 64   | 69  | 62   | 52  | 64   |
| Aberrant motor behavior %  | 49   | 40  | 49  | 45   | 48   | 45  | 41  | 50   | 49   | 46   | 57  | 45   | 41  | 47   |
| Sleep/nighttime behavior % | 62   | 60  | 65  | 58   | 62   | 58  | 61  | 60   | 60   | 61   | 66  | 60   | 57  | 61   |
| Appetite/eating %          | 59   | 60  | 60  | 58   | 59   | 58  | 57  | 60   | 61   | 59   | 61  | 58   | 57  | 59   |

AD: Alzheimer’s disease (intermediate or high ABC criteria), LBD: Lewy Body disease, CAA: Cerebral Amyloid Angiopathy, CVD: cerebrovascular disease, FTLD: Fronto-temporal Dementia, HS: Hippocampal Sclerosis, NP: No Pathology. Frequencies were rounded to the nearest integer.

**eTable 2. Linear regression analyses of neuropathology subtypes (present/absent) on mean NPI-Q scores during follow-up**

| <b>NPI-Q Domain</b>          | <b>AD</b>           | <b>LBD</b>          | <b>CAA</b>          | <b>CVD</b>         | <b>FTLD</b>          | <b>HS</b>           | <b>NP</b>            |
|------------------------------|---------------------|---------------------|---------------------|--------------------|----------------------|---------------------|----------------------|
| Delusions                    | 0.16 (0.11-0.21)*   | 0.07 (0.03-0.12)*   | 0.1 (0.05-0.14)*    | 0.01 (-0.04-0.06)  | -0.11 (-0.16--0.05)* | 0.01 (-0.05-0.07)   | -0.11 (-0.19--0.02)* |
| Hallucinations               | 0.11 (0.07-0.15)*   | 0.13 (0.09-0.16)*   | 0.06 (0.02-0.1)*    | -0.02 (-0.07-0.02) | -0.12 (-0.17--0.07)* | -0.04 (-0.09-0.02)  | -0.06 (-0.14-0.01)   |
| Agitation/Aggression         | 0.12 (0.06-0.18)*   | 0.01 (-0.05-0.07)   | 0.09 (0.03-0.15)*   | 0.04 (-0.03-0.1)   | -0.11 (-0.18--0.03)* | 0.05 (-0.03-0.14)   | 0.05 (-0.06-0.17)    |
| Dysphoria/Depression         | 0.02 (-0.04-0.08)   | 0.06 (0.01-0.12)    | -0.01 (-0.07-0.04)  | 0.02 (-0.04-0.08)  | -0.03 (-0.1-0.04)    | -0.09 (-0.17--0.01) | 0.06 (-0.05-0.16)    |
| Anxiety                      | 0.16 (0.09-0.22)*   | 0.07 (0.01-0.13)    | 0.07 (0.01-0.13)    | 0.02 (-0.05-0.08)  | -0.05 (-0.13-0.03)   | 0.06 (-0.02-0.15)   | -0.16 (-0.27--0.04)* |
| Euphoria/Elation             | -0.01 (-0.05-0.02)  | -0.03 (-0.06-0)     | -0.02 (-0.05-0.01)  | 0.01 (-0.02-0.04)  | 0.04 (0.01-0.08)     | 0.03 (-0.01-0.07)   | 0.02 (-0.03-0.08)    |
| Apathy                       | -0.03 (-0.11-0.05)  | 0.05 (-0.02-0.12)   | -0.03 (-0.11-0.04)  | -0.02 (-0.11-0.06) | 0.23 (0.13-0.32)*    | 0.17 (0.07-0.28)*   | 0.03 (-0.1-0.17)     |
| Disinhibition                | -0.09 (-0.15-0.02)* | -0.08 (-0.14-0.02)* | -0.09 (-0.15-0.03)* | 0.01 (-0.06-0.07)  | 0.14 (0.06-0.22)*    | 0.15 (0.07-0.24)*   | 0.11 (0-0.23)        |
| Irritability/Lability        | 0.08 (0.01-0.14)    | -0.01 (-0.07-0.05)  | 0.05 (-0.01-0.11)   | 0.04 (-0.02-0.11)  | -0.04 (-0.12-0.04)   | 0.03 (-0.05-0.11)   | 0.03 (-0.08-0.14)    |
| Aberrant Motor Behavior      | 0.01 (-0.06-0.07)   | -0.03 (-0.09-0.03)  | -0.02 (-0.08-0.04)  | -0.01 (-0.08-0.05) | 0.11 (0.03-0.19)*    | 0.09 (0.01-0.17)    | 0.03 (-0.09-0.14)    |
| Sleep/nighttime Behavior     | -0.02 (-0.09-0.05)  | 0.11 (0.04-0.17)*   | -0.04 (-0.11-0.02)  | 0.05 (-0.01-0.12)  | 0.08 (0-0.16)        | -0.01 (-0.1-0.08)   | -0.02 (-0.13-0.1)    |
| Appetite/Eating Disturbances | -0.08 (-0.14-0.02)* | -0.01 (-0.07-0.05)  | -0.08 (-0.13-0.02)* | 0.04 (-0.02-0.11)  | 0.14 (0.07-0.21)*    | 0.01 (-0.07-0.09)   | 0.08 (-0.03-0.18)    |

All regression analyses were adjusted for age at death, sex, and difference in years between NPI-Q assessment and death. Standardized Beta coefficients with 95% confidence intervals are reported in the table.

AD: Alzheimer’s disease (intermediate or high ABC criteria), LBD: Lewy Body disease, CAA: Cerebral Amyloid Angiopathy, CVD: cerebrovascular disease, FTLD: Fronto-temporal Dementia, HS: Hippocampal Sclerosis, NP: No Pathology.

\*p<.05 after multiple comparisons correction controlling for false discovery rate.

**eTable 3. Prevalence of single vs concurrent apathy and disinhibition in Frontotemporal Lobar Degeneration and Hippocampal Sclerosis**

| <i>FTLD/HS</i>   | <i>Apathy and Disinhibition</i> |                    |               |               |               |
|------------------|---------------------------------|--------------------|---------------|---------------|---------------|
|                  | No                              | Disinhibition only | Apathy only   | Both          | Total         |
| No FTLD, No HS   | 343<br>28.1 %                   | 96<br>7.9 %        | 326<br>26.7 % | 456<br>37.3 % | 1221<br>100 % |
| HS only          | 29<br>14.1 %                    | 14<br>6.8 %        | 52<br>25.2 %  | 111<br>53.9 % | 206<br>100 %  |
| FTLD only        | 50<br>20 %                      | 14<br>5.6 %        | 84<br>33.6 %  | 102<br>40.8 % | 250<br>100 %  |
| Both FTLD and HS | 5<br>11.1 %                     | 1<br>2.2 %         | 11<br>24.4 %  | 28<br>62.2 %  | 45<br>100 %   |
| <i>Total</i>     | 427<br>24.8 %                   | 125<br>7.3 %       | 473<br>27.5 % | 697<br>40.5 % | 1722<br>100 % |

FTLD: Frontotemporal Lobar Degeneration. HS: Hippocampal Sclerosis.
